# Supplementary material for: Niche displacement of human leukemic stem cells uniquely allows their competitive replacement with healthy HSPCs
Source: PubMed Central journal article supplement — J Exp Med. 2014 Sep 22;211(10):1925–35. doi: 10.1084/jem.20140131 (PMC4172227; doi:10.1084/jem.20140131), 2014-09-22
Supplement: supp_jem.20140131_JEM_20140131_sm.pdf [file supp_jem.20140131_JEM_20140131_sm.pdf]

SUPPLEMENTAL MATERIAL

Boyd et al., <http://www.jem.org/cgi/content/full/jem.20140131/DC1>

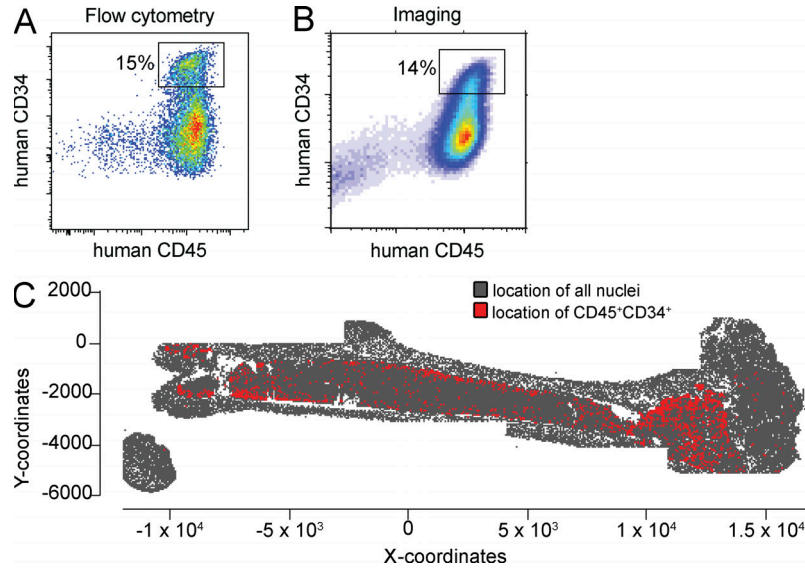

**Figure S1. Gating strategies to quantify primitive leukemic cells in xenografted mouse femurs.** Representative gating strategies showing similar frequencies of human CD45<sup>+</sup>CD34<sup>+</sup> cells detected from different bones of the same mouse, as measured by flow cytometry (A) or whole-bone section imaging (B). (C) Representative total distribution of individually detected CD45<sup>+</sup>CD34<sup>+</sup> cells within an AML-engrafted mouse femur.

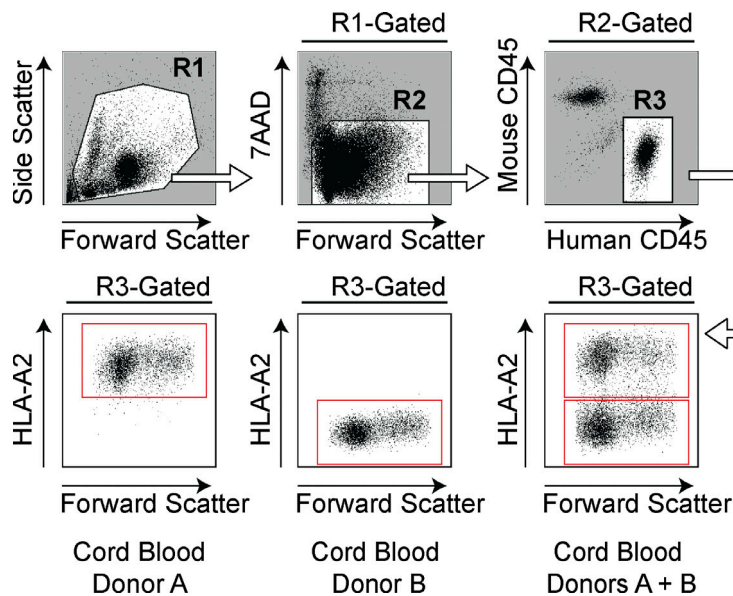

**Figure S2. HLA-A2 mismatching provides a means to track hematopoietic cells from individual human donors transplanted into immunodeficient mice.** Representative flow cytometry strategy to analyze the use of HLA-A2 disparity as a means of monitoring relative BM graft contributions of primary cells from pairs of different human individuals.

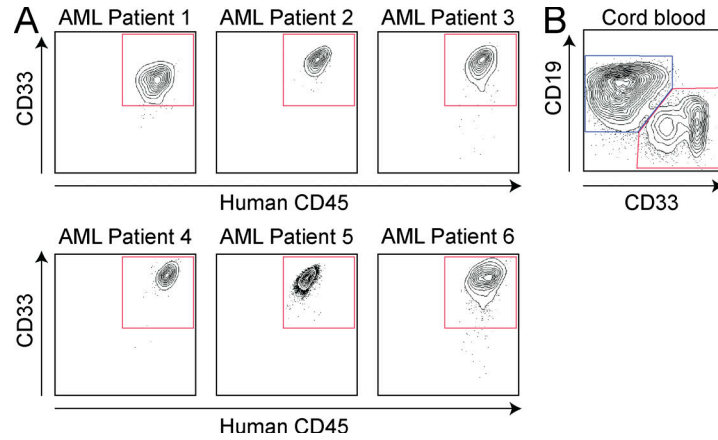

**Figure S3. Multilineage gating strategy for cotransplanted human AML and CB samples.** (A) Representative multilineage flow cytometry gating strategy for each primary AML patient sample evaluated in HSPC cotransplantation experiments show exclusive myeloid leukemic engraftment after patient-specific HLA-A2 gating. (B) Representative gating strategy shows that multilineage hematopoiesis is evident from healthy CB-HSPCs cotransplanted with AML, as determined by donor-specific HLA-A2 gating. Both myeloid (red gate) and lymphoid (blue gate) subpopulations were consistently detected.

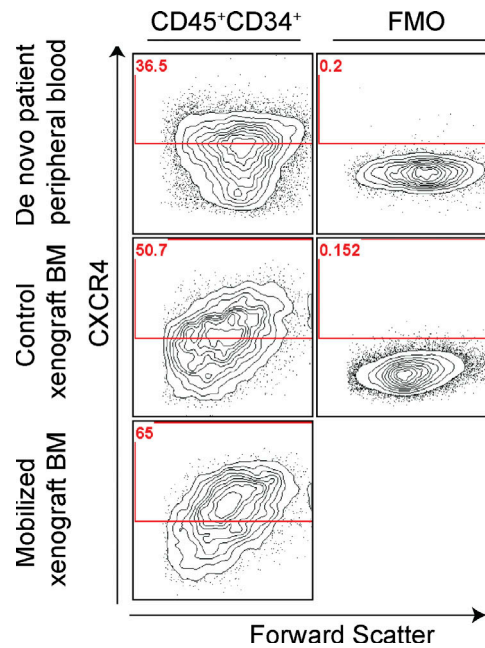

**Figure S4. Gating strategy to evaluate the influence of AML graft mobilization on CXCR4 expression.** Representative flow cytometry gating strategy showing that CXCR4 levels are appropriately increased on AML CD34<sup>+</sup> cells 1 h after mobilization (Petit et al., 2002). Fluorescence minus one (FMO) controls are included to demonstrate gating strategy.

**Table S1.** Clinical details of AML samples used.

| Sample | Tissue source | Disease stage       | Patient gender | Patient age |
|--------|---------------|---------------------|----------------|-------------|
| AML 1  | PB            | Progressed from MDS | Female         | 83          |
| AML 2  | PB            | Relapse (M4)        | Female         | 51          |
| AML 3  | PB            | New diagnosis (M4)  | Male           | 56          |
| AML 4  | BM            | Relapse (M5b)       | Male           | 71          |
| AML 5  | PB            | New diagnosis       | Female         | 89          |
| AML 6  | Leukapheresis | Progressed from MDS | Male           | 48          |

#### REFERENCE

Petit, I., M. Szyper-Kravitz, A. Nagler, M. Lahav, A. Peled, L. Habler, T. Ponomaryov, R.S. Taichman, F. Arenzana-Seisdedos, N. Fujii, et al. 2002. G-CSF induces stem cell mobilization by decreasing bone marrow SDF-1 and up-regulating CXCR4. *Nat. Immunol.* 3:687–694.<http://dx.doi.org/10.1038/ni813>
